# Supplementary material for: Photocatalytic activity of Hemin (Fe(iii) porphyrin) anchored BaTiO3under the illumination of visible light: synergetic effects of photosensitization, photo-Fenton & photocatalysis processes
Source: Royal Society of Chemistry journal article supplement (doi:10.1039/c7qi00590c), 2017-10-23
Supplement: c7qi00590c1.pdf [file c7qi00590c1.pdf]

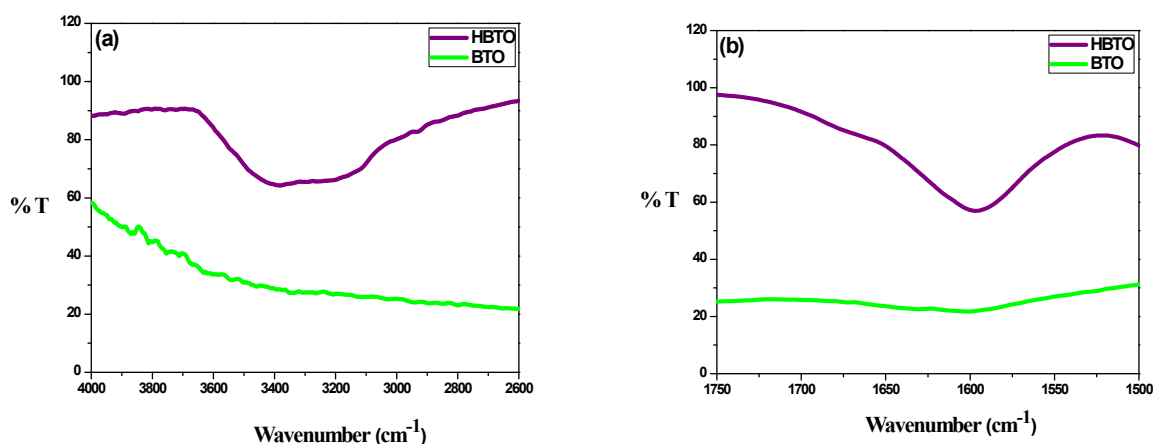

**Fig. S 1** Enlarged images of FTIR Spectrum of BTO and HBTO samples for peaks at (a) 3480  $\text{cm}^{-1}$  and (b) 1640  $\text{cm}^{-1}$  peaks.

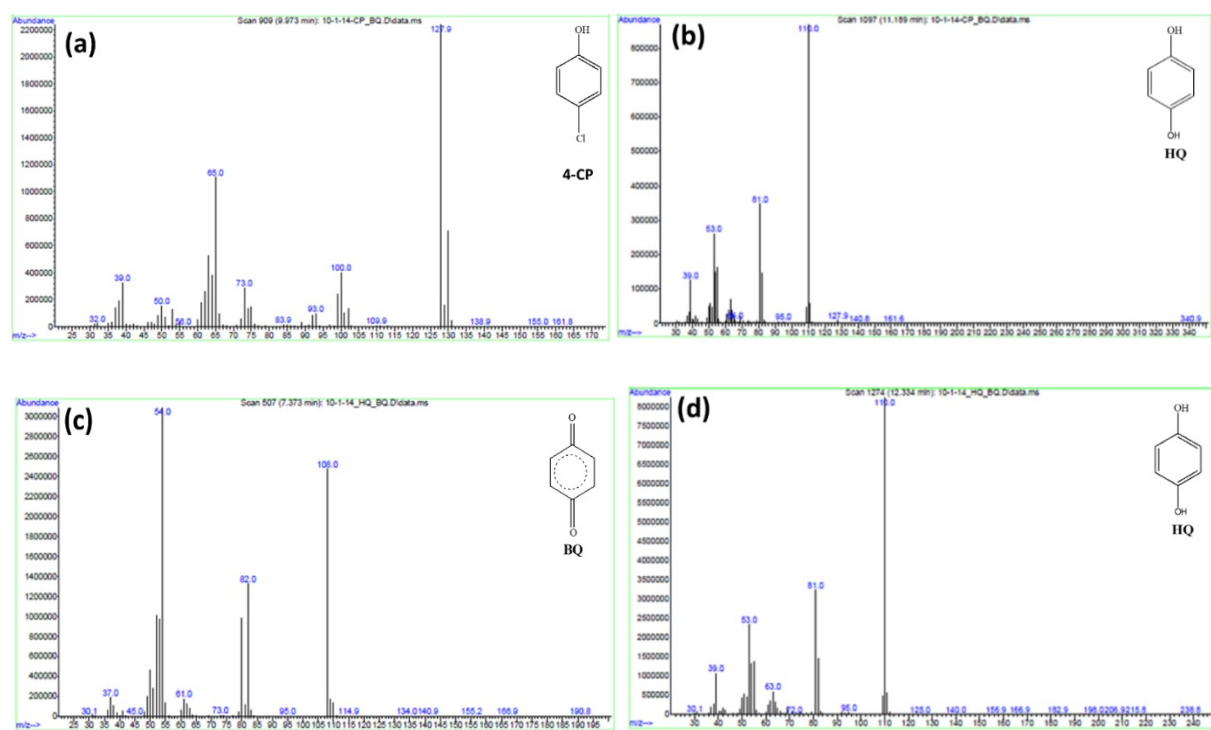

**Fig. S 2** Detection of intermediates during the course of the degradation of 4-CP at time intervals of 30 min and 105 min by GC-MS technique.

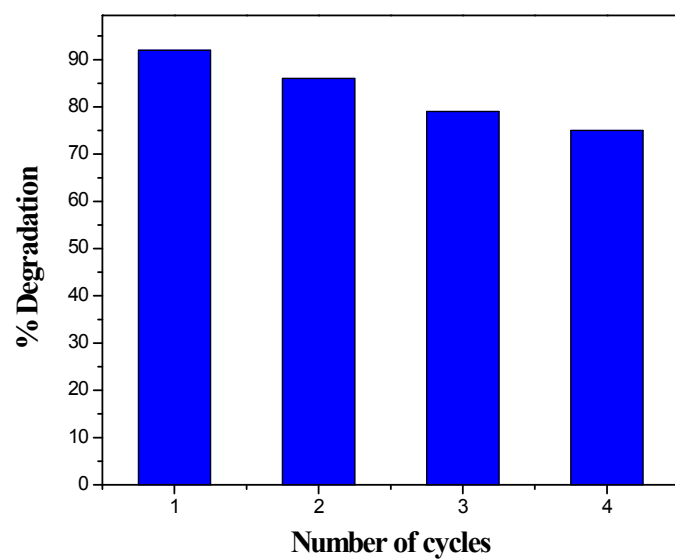

**Fig. S 3** Bar diagram depicting percentage degradation versus number of cycles for the degradation of 4-CP using HBTO photocatalyst under solar light illumination.
